# Supplementary material for: Prescription of Therapeutic Exercise in Migraine. An Evidence-Based Clinical Practice Guideline of the Professional College of Physiotherapists of the Community of Madrid
Source: Research Square preprint supplement (doi:10.21203/rs.3.rs-2625246/v1), 2023-03-02
Supplement: Supplementary file 1 [file 0e6d14ffa9eb4d97a6cc0651.docx]

**Table 7.** ROBIS results of systematic reviews.

| **Review** | **Phase 2** | | | | **Phase 3** |
| --- | --- | --- | --- | --- | --- |
| **1. STUDY ELIGIBILITY CRITERIA** | **2. IDENTIFICATION AND SELECTION OF STUDIES** | **3. DATA COLLECTION AND STUDY APPRAISAL** | **4. SYNTHESIS AND FINDINGS** | **RISK OF BIAS IN THE REVIEW** |
| La Touche et al., 2020 | ☺ | ☺ | ☺ | ☺ | ☺ |
| Lemmens et al., 2019 | ☺ | ☹ | ☺ | ☺ | ☹ |
| Long et al., 2022 | ☺ | ☹ | ☹ | ☹ | ☹ |
| Luedtke et al., 2016 | ☺ | ? | ☺ | ☺ | ☺ |
| Varangot-Reille et al., 2021 | ☺ | ☺ | ☺ | ☺ | ☺ |
| Wu et al., 2022 | ☺ | ☺ | ☺ | ☺ | ☺ |

☺ = low risk; ☹ = high risk; ? = unclear risk
