# Supplementary material for: Prescription of Therapeutic Exercise in Migraine. An Evidence-Based Clinical Practice Guideline of the Professional College of Physiotherapists of the Community of Madrid
Source: Research Square preprint supplement (doi:10.21203/rs.3.rs-2625246/v1), 2023-03-02
Supplement: Supplementary file 2 [file 1a308d6f472bbcf68aee9b54.docx]

**Table 2.** Quality Assessment Scale for Systematic Review.

| Studies | Item nº1 | Item nº2 | Item nº3 | Item nº4 | Item nº5 | Item nº6 | Item nº7 | Item nº8 | Item nº9 | Item nº10 | Item nº11 | Item nº12 | Item nº13 | Total |
| --- | --- | --- | --- | --- | --- | --- | --- | --- | --- | --- | --- | --- | --- | --- |
| La Touche et al., 2020 | Yes | Yes | Yes | Yes | Yes | Yes | Yes | Yes | Yes | Yes | Yes | Yes | Yes | 26 |
| Lemmens et al., 2019 | Yes | In Part | Yes | Yes | In Part | Yes | Yes | Yes | Yes | Yes | Yes | Yes | Yes | 24 |
| Long et al., 2022 | In Part | Yes | No | No | Yes | In Part | No | Yes | In Part | In Part | Yes | No | No | 12 |
| Luedtke et al., 2016 | In Part | Yes | Yes | Yes | In Part | Yes | Yes | Yes | Yes | In Part | Yes | Yes | Yes | 23 |
| Varangot-Reille et al., 2021 | In Part | Yes | Yes | Yes | Yes | Yes | Yes | Yes | Yes | Yes | Yes | Yes | Yes | 25 |
| Wu et al., 2022 | Yes | Yes | Yes | No | No | Yes | In Part | No | Yes | Yes | Yes | Yes | Yes | 17 |
