# Supplementary material for: Prescription of Therapeutic Exercise in Migraine. An Evidence-Based Clinical Practice Guideline of the Professional College of Physiotherapists of the Community of Madrid
Source: Research Square preprint supplement (doi:10.21203/rs.3.rs-2625246/v1), 2023-03-02
Supplement: Supplementary file 3 [file 3d0305d896dd4fa655da6569.docx]

**Table 6.** SANRA scale for narrative reviews.

| **Studies** | **Item nº1** | **Item nº2** | **Item nº3** | **Item nº4** | **Item nº5** | **Item nº6** | **Total** |
| --- | --- | --- | --- | --- | --- | --- | --- |
| **Agbetoy et al., 2022** | 0 | 0 | 1 | 2 | 0 | 0 | **3** |
| **Ahn et al., 2013** | 0 | 1 | 0 | 2 | 1 | 1 | **5** |
| **Amin et al., 2018** | 2 | 2 | 1 | 2 | 2 | 2 | **11** |
| **Barber et al., 2020** | 2 | 2 | 0 | 2 | 2 | 2 | **10** |
| **Becker et al., 2009** | 0 | 0 | 0 | 0 | 2 | 1 | **3** |
| **Busch V, Gaul C, Headache, 2008** | 1 | 2 | 1 | 2 | 2 | 2 | **10** |
| **Busch V, Gaul C, Schmerz, 2008** | 2 | 2 | 2 | 2 | 2 | 2 | **12** |
| **Daenen et al., 2015** | 1 | 2 | 0 | 2 | 1 | 0 | **6** |
| **Hindiyeh et al., 2013** | 1 | 1 | 0 | 1 | 1 | 1 | **5** |
| **Irby et al., 2015** | 2 | 1 | 0 | 2 | 2 | 1 | **8** |
| **Lippi et al., 2018** | 2 | 2 | 1 | 1 | 0 | 2 | **8** |
| **Mauskop et al., 2012** | 1 | 1 | 0 | 2 | 1 | 1 | **6** |
| **Meyer et al., 2018** | 1 | 1 | 0 | 2 | 2 | 2 | **8** |
| **Ocronos. 2021;4(5) 164** | 1 | 2 | 1 | 2 | 1 | 0 | **7** |
| **Patel et al., 2019** | 2 | 2 | 0 | 2 | 2 | 1 | **9** |
| **Robblee et al., 2019** | 1 | 2 | 0 | 2 | 2 | 1 | **8** |
| **Song et al., 2021** | 1 | 2 | 1 | 2 | 2 | 2 | **10** |
| **Tepper et al., 2015** | 1 | 2 | 0 | 1 | 2 | 2 | **8** |
| **Wells et al., 2019** | 0 | 2 | 1 | 2 | 2 | 2 | **9** |
