# Supplementary material for: Prescription of Therapeutic Exercise in Migraine. An Evidence-Based Clinical Practice Guideline of the Professional College of Physiotherapists of the Community of Madrid
Source: Research Square preprint supplement (doi:10.21203/rs.3.rs-2625246/v1), 2023-03-02
Supplement: Supplementary file 5 [file 5881c2031de5d89c8e445527.docx]

**Table 1.** SIGN levels of evidence and grades of recommendation.

| **Levels of evidence** | | **Grades of recommendation** | |
| --- | --- | --- | --- |
| **1++** | High-quality meta-analysis, systematic reviews of RCTs or RCTs with very low risk of bias | A | At least one meta-analysis, systematic review or RCT rated as 1++ and directly applicable to the target population OR |
| **1+** | Well-conducted meta-analyses, systematic reviews of RCTs or RCTs with low risk of bias | A systematic review of RCTs or a body of evidence consisting principally of studies rated as 1+ directly applicable to the target population and demonstrating overall consistency of results |
| **1-** | Meta-analyses, systematic reviews or RCTs, or RCTs with high risk of bias | B | A body of evidence including studies rated as 2++ directly applicable to the target population and demonstrating overall consistency of results OR |
| **2++** | High-quality systematic reviews of case-control or cohort studies or  High-quality case-control or cohort studies with a very low risk of confounding, bias or chance and a high probability that the relationship is causal | Extrapolated evidence from studies rated as 1++ or 1+ |
| **2+** | Well-conducted case-control or cohort studies with a low risk of confounding, bias or chance and a moderate probability that the relationship is causal | C | A body of evidence including studies rated as 2+ directly applicable to the target population and demonstrating overall consistency of results OR |
| **2-** | Case-control or cohort studies with a high risk of confounding, bias or chance and a significant risk that the relationship is not causal | Extrapolated evidence from studies rated as 2++ |
| **3** | Non-analytic studies, e.g., case reports, case series | D | Evidence level 3 or 4 OR |
| **4** | Expert opinion |
| Extrapolated evidence from studies rated as 2+ |
