# Supplementary material for: Prescription of Therapeutic Exercise in Migraine. An Evidence-Based Clinical Practice Guideline of the Professional College of Physiotherapists of the Community of Madrid
Source: Research Square preprint supplement (doi:10.21203/rs.3.rs-2625246/v1), 2023-03-02
Supplement: Supplementary file 6 [file 7a11eae2ee4a3c415a94b5ac.docx]

**Table 4.** NOS scale for cohort studies.

| Study | Selection Item nº1 | Selection Item nº2 | Selection Item nº3 | Selection Item nº4 | Comparability | Outcome Item nº1 | Outcome Item nº2 | Outcome Item nº3 | Total | Methodological Quality |
| --- | --- | --- | --- | --- | --- | --- | --- | --- | --- | --- |
| Gaul et al., 2011 | - | - | ★ | ★ | - | - | ★ | - | 3/9 | Poor |
| Hagan et al., 2020 | ★ | ★ | - | ★ | ★★ | - | - | ★ | 6/9 | Good |
| Seok et al., 2020 | ★ | ★ | ★ | ★ | ★★ | - | ★ | ★ | 8/9 | Excellent |
| Woldeamanuel et al., 2016 | ★ | ★ | - | ★ | ★★ | - | ★ | ★ | 7/9 | Good |
