# Supplementary material for: Prescription of Therapeutic Exercise in Migraine. An Evidence-Based Clinical Practice Guideline of the Professional College of Physiotherapists of the Community of Madrid
Source: Research Square preprint supplement (doi:10.21203/rs.3.rs-2625246/v1), 2023-03-02
Supplement: Supplementary file 7 [file 94ce26e554c3379cb32826bd.docx]

**Table 11.** Prescription parameters summary.

| Tipe of intervention | Migraine diagnosis | Trials | Type of exercise | Distribution | Frequency | Duration (per session) | Intensity | Exercise testing | Grade of recommendation |
| --- | --- | --- | --- | --- | --- | --- | --- | --- | --- |
| Moderate intensity continuous aerobic training | Episodic or chronic migraine | N=12  RCTs (n=6): Hanssen 2018, Varkey 2011, Hanssen 2017, Belitardo-Oliveira 2017, Belitardo-Oliveira 2019, Ahmadi 2015  Q-RCTs (n=5): Darabaneanu 2011, Luedtke 2020, Varkey 2009, Overath 2014, Narin 2003.  Cohort (n=1):  Hagan 2020 | Supervised modalities: running, jogging, indoor cycling or cross-training  Unsupervised modalities: nordic walking, slow running, outdoor cycling, swimming, cycling ergometer, brisk walking, dancing, other activities.  Supervised exercise (n=9): Hanssen 2018, Varkey 2011, Hanssen 2017, Belitardo-Oliveira 2017, Belitardo-Oliveira 2019, Darabaneanu 2011, Varkey 2009, Overath 2014, Narin 2003.  Supervised and unsupervised exercise (n=2): Luedtke 2020, Narin 2003.  No information concerning supervised/unsupervised (n=1): Ahmadi 2015. | Warm up from 5 to 15 min with walking, jogging, or easy cycling.  Main training performed from 20 to 30 min.  Cool down from 5 to 10 min with easy cycling, jogging, walking or stretching. | 2-3 times/week for 5-12 weeks. | Total duration of 30 to 50 min. | Warm up gradually increased from 11 to 13 Borg.  Main training performed between 13-16 Borg, 70% HRmax (±5 bpm) or at the intensity corresponding to participant’s ventilatory threshold.  Cool down between 11-13 Borg. | Initial evaluation of individual anaerobic lactate-threshold, HRmax, VO2 max or ventilatory threshold (calculated with lactate blood test or respiratory gas exchange analysis).  Monitoring during exercise with Borg scale, %HRmax and/or speed (m/min). | B in favour of intervention |
| Yoga | Episodic migraine | N=6  RCTs (6): Kumar 2020, Kisan 2014, Boroujeni 2015, John 2007, Mehta 2020, Wells 2020 | Yoga:  Full program under supervision; the first session or first month is supervised and the rest of the program is performed at home with audio-visual guidance if possible, or ensuring compliance with the routine with a telephone call every week or two months and/or with a diary checking compliance or self-reported yoga log  maintained by the patient, and/or with the possibility of visiting professionals. | First part: Starting prayer, breathing, stretching and relaxation exercise (including Instant Relaxation Technique and Quick Relaxation Technique). Eye-related and backward bending exercise.  Second part:  Asanas, savana, pavanmoktasanas, pranayama or pre-pranayama, neti exercise, standing-sitting and lying out screw position, kriya (Jalaneti followed by Kapalbhanti), sukshma vyayama, surya namaskar.  Final part:  Shavasana or relaxation. | 3-7 times/week for 6-12 weeks. | Total duration of 60-75 minutes. | - | - | B in favour of intervention |
| Exercise and lifestyle  recommendations | Episodic and chronic migraine | N = 5  RCTs = 2 Bond 2018 Lemstra 2002  Cohort = 3 Seok 2006 Wodeamanuel 2016 Gaul 2011 | Home-based exercise, stretching, light weightlifting training, endurance training (mainly using sport gym equipment), or any modality of daily aerobic exercise that raise the heart rate. | - | 3-7 times/week for 6 weeks to more than 6 months. | Total duration of 20-60 min. | Main training performed at a moderate to submaximal intensity. | - | B in favour of intervention |
| Relaxation techniques | Episodic and chronic migraine | RCTs (n=3): Varkey 2011, Meyer 2016, Minen 2020 | - | 6 relaxation exercises based on breathing and stress-management techniques, from 5 to 20 min of duration each exercise, or Progressive Muscle Relaxation including 16 muscle exercises or Smartphone app with Progressive Muscle Relaxation program. | 1-6 times/week for 6-12 weeks. | Total duration of 15 min to 120 min. | - | - | C in favour of intervention |
| High-intensity aerobic interval training | Episodic migraine | N = 3  RCTs = 3  Hanssen 2017  Hanssen 2018  Matin 2022 | Running on a treadmill.  Bicycle.  Supervised. | Warm-up = 400 m easy running on a treadmill and 2 skipping exercises or 10 mins cycling.  Main training = High-intensity interval running on a treadmill or bicycle.  Cool down = 400 m easy running on a treadmill and stretching exercises or 5 mins cycling. | 2-3 times/week for 8-12 weeks. | Main training = 10-40 min.  High intensity – moderate intensity intervals (min) = 4-3.  High-moderate intensity intervals were repeated 4 times. | High intensity:  Progression from Borg 11 to 18 or from 60% VO2 max to 80% in 8 weeks.  Maximum high-intensity reached 90%-95% HR Max.  Maximum active rest period intensity reached: 70% HRmax. | -Individual  anaerobic  lactate-threshold.  -HRmax.  -VO2 max  (supervised).  -Borg. | C in favour of intervention |
| Low-intensity aerobic exercise | Episodic migraine | N=2  RCT (1): Santiago 2014  Q-RCT (1): Koseglu 2003 | Home active exercise or fast walk outdoors, not supervised. | Warm-up exercises for 10 minutes.  Main training performed for 20-40 min.  Resting period performed for 10 min. | 3 times/week for 6-12 weeks. | Total duration of 40 min. | Main training performed at 60% HRmax. | HR. | C in favour of intervention |
| Exercise and relaxation techniques | Episodic and chronic migraine | RCT (n=2): Dittrich 2008  Mehta 2020  Q-RCTs (n=1) Butt 2022 | Relaxation exercise and stationary cycling, or gymnastics with music, aerobic and strength training, or stretching, isometric exercise and walking.  Not reported if supervised or not. | Warm up =5-10 min  Main training = 30 min of moderate aerobic exercise or 15-25 min of aerobic training and 10-20 of strength training.  Or self-stretching of neck muscles (30 seconds hold 3 repetitions), neck isometric exercise (5 second hold, 10 repetitions) and 30 minutes walking  Progressive muscle relaxation= 15 min.  Cool down or stretching = 5 min. | 2-3 times/week for 6-12 weeks. | Total duration of 45-60 min. | - | - | C in favour of intervention |
| Neck strength exercise | Episodic migraine | RCT (n=1): Benatto 2002 | Strength exercise for superficial and deep flexor and extensor craniocervical musculature with home exercise for craniocervical musculature and stretching. | First stage: deep muscle training, 2 sets of 10 repetitions for deep flexor and extensor musculature, for 6 weeks. Individually progressed in number of series, repetitions and endurance.  Second stage: deep and superficial muscle training for the next 2 weeks, including 3 sets of 15 repetitions for superficial flexor and extensor musculature. | 1 day per week under supervision and 2 times/day everyday with home exercises for 8 weeks. | Total duration of 20 min. | - | - | C against the intervention |
| Resistance exercise | Episodic migraine | RCTs (n=1): Aslani 2022 | Resistance exercise with dumbbells, arm pull down, arm pull over, sit up, leg curl machine, and leg extension machine.  Not reported if supervised or not. | Warm up for 15 minutes with jogging, stretching, and weightlifting.  Main training performed from 30 to 45 min, 2-3 sets of 8-15 repetitions of arm pull down, arm pull over, sit up, leg extension and leg curl.  Cool down for 5 min with active cooling and stretching movements | 3 times/week for 8 weeks. | Total duration of 30 to 45 min. | Main training gradually performed from 45% RM to 75% RM. | RM. | C in favour of intervention |
| Qi-Gong | Episodic migraine | Case series (n=1): Elinoff 2019 | Supervised exercise.  Ju Fu (Gentle Wind) method. | First face-to-face history of Qi-Gong explanation and exercise sequence = Ju Fu (Gentle Wind).  -Qigong exercise DVD duplicating the content of the first and subsequent lessons for home practice.  Two subsequent face-to-face sessions to reinforce training and add complexity and length to the Kiko sequence. | Daily home practice, for 3 months.  Two subsequent face-to-face sessions every 30 days. | Total duration of 10 min at least. | - | - | D in favour of intervention |

**Abbreviations:** bpm, beats per minute; HR, heart rate; HRmax, maximal heart rate; m/min, meters/minute; min, minutes; q-RCT, quasi–Randomized Clinical Trial; RCT, Randomized Controlled Trial; RM, Repetition Maximum; VO2max, Maximal oxygen uptake.
