# Supplementary material for: Prescription of Therapeutic Exercise in Migraine. An Evidence-Based Clinical Practice Guideline of the Professional College of Physiotherapists of the Community of Madrid
Source: Research Square preprint supplement (doi:10.21203/rs.3.rs-2625246/v1), 2023-03-02
Supplement: Supplementary file 8 [file a273df6cb165d95fe4f98539.docx]

**Table 8.** Summary table with each exercise modality and its respective studies.

| Study | Design and Diagnosis | Intervention | Key Outcomes and Follow-up | Results Within Group | Results Between Group | Level of Evidence | Adverse effects |
| --- | --- | --- | --- | --- | --- | --- | --- |
| **AEROBIC EXERCISE**  **GRADE OF RECOMMENDATION: B in favour of intervention** | | | | | | | |
| **Herranz-Gómez et al., 2021** | MMA, umbrella and mapping review  ICHD | **Experimental group**: Aerobic exercise, manual therapy and manual therapy with therapeutic exercise.  **Control group:**  Any type of intervention it was possible to isolate. | Frequency (days/month or days/week)  Pain intensity (VAS, NPRS, numeric pain index, MVK pain scale)  Disability (HDI)  Quality of life (HIT-6, SF-36, SF-12). | There is moderate evidence that aerobic exercise reduces pain intensity in migraine patients. The applied interventions showed a positive effect in terms of pain intensity, quality of life and frequency. |  | 1- | No adverse effects were reported. |
| **La Touche et al.,2020** | SR of RCTs and q-RCTs  MA of RCTs  Migraine with or without aura diagnosed with ICHD | **Experimental group**: aerobic exercise.  **Control group**: Other forms of exercise, minimal education, information, maintenance of daily living activity or drugs. | Frequency (days/month or days/week)  Pain intensity (VAS)  Duration (hours of migraine)  Quality of life (HIT-6, PLC, WHO-5, MSQoL, grading the severity of chronic pain). | It was found statistically significant differences in the decrease in pain intensity, frequency and duration of migraine in the short term, and an increase in quality of life. Aerobic exercise has low to moderate evidence in migraine patients. |  | 1- | No adverse effects were reported. |
| **Lemmens et al., 2019** | SR of RCTs and q-RCT s  MA of RCTs and Q-RCT s  Migraine diagnosed with the ICHD-II | **Experimental group**: Physical endurance, physical fitness, aerobic exercise and exercise therapy performed during at least 6 weeks.  **Control group:** no intervention, education, treatment based on medication, relaxation therapy and advice to maintain habitual daily activity. | Frequency (days/month)  Pain intensity (NPRS, VAS)  Duration (hours/attack and hours/month). | Significant reductions in the number of migraine days after aerobic exercise treatment were found, and small to moderate reductions in attack duration and pain intensity after aerobic exercise intervention. |  | 1- | No adverse effects were reported. |
| **Luedtke et al., 2016** | SR of RCTs and q-RCT s  MA of RCTs  Migraine diagnosed with IHS criteria | **Experimental group:** standard physiotherapy (exercise, manual therapy, soft-tissue techniques, or strength and endurance training).  **Control group:** placebo, standard care, waiting list or other active intervention. | Frequency (number of episodes or number of headache days  within a defined period of time)  Pain intensity (VAS)  Duration (hours or  days without relief). | Aerobic exercise results suggest a statistically significant reduction in the intensity, frequency and duration of migraine. |  | 1- | No adverse effects were reported. |
| **Varangot et al., 2021** | SR and MA of RCTs  ICHD and medical diagnosis | **Experimental group:** exercise training (aerobic training, strength training, yoga or aerobic and strength training).  **Control group:** non-active interventions, education, relaxation, breathing or no interventions. | Frequency (painful days/month)  Pain intensity (VAS, NRS)  Duration (hours)  Disability (HDI, HIT-6, HIT, PDI)  Quality of life (SF-36). | Aerobic training has a small to moderate clinical effect on pain intensity and frequency of headache episodes in migraine patients, with very low to low certainty of evidence. |  | 1- | The study of Lemstra et al 2002 reported minor musculoskeletal pain in 20% of patients in the intervention group, which include exercise as part of the therapy. |
| **Ahn et al., 2013** | Narrative review  - | - | - | There are several lines of evidence supporting the role of exercise in migraine management. Though individually these studies have some limitations, they are still altogether compelling because this view still emerges clearly from several independent lines of investigation. | - | 4 | No adverse effects were reported. |
| **Amin et al., 2018** | Narrative review  - | - | - | It seems that although exercise can trigger migraine attacks, regular exercise may have a prophylactic effect on migraine frequency. This is most likely due to an altered migraine-triggering threshold in people who exercise regularly. Frequency and intensity of exercise that is required is unclear. | - | 4 | Exercise can minimally trigger migraine. |
| **Barber et al., 2020** | Narrative review | **-** | - | An aerobic exercise routine alone is sufficient to reduce migraine frequency, intensity, and duration. Higher-intensity training appears to confer more benefits. The addition of exercise to a traditional preventive regimen may provide added benefits. Patients who cannot tolerate high-impact exercise may even benefit from low-impact exercises like yoga. | - | 4 | Exercise may induce migraine. |
| **Busch V, Gaul C, Headache, 2008** | Narrative review  - | - | - | Most of the reviewed studies did not find a significant reduction of headache attacks or headache duration and only indicate a reduction of pain intensity in migraine patients due to regular exercise. | - | 4 | It should not be forgotten that exercise can induce sport-related headaches. |
| **Busch V, Gaul C, Schmerz, 2008** | Narrative review  - | - | - | Regular endurance sports are found in many general recommendations for the treatment of migraine patients. However, the evidence on which these recommendations are based is weak. | - | 4 | No adverse effects were reported. |
| **Daenen et al., 2015** | Narrative review  - | - | - | Aerobic exercise on a submaximal level is the best option in migraine prophylaxis. | - | 4 | Exercise could be a migraine-triggering factor. |
| **Guarin-Duque et al., 2021** | Narrative review  - | - | - | Adults who don't tolerate migraine drugs very well may find relief in preventive therapies such as exercise. | - | 4 | Some authors show that exercise, especially if it is at high intensity, can trigger a migraine attack. |
| **Hindiyeh et al., 2013** | Narrative review  - | - | - | There are demonstrable  differences in the way migraineurs respond to aerobic exercise during their headaches and there is more than a suggestion that  migraineurs do, in fact, process the changes brought on by aerobic activity differently than non-migraineurs or  migraineurs when they are inter-ictal. | - | 4 | 22 % of migraineurs list exercise as a trigger. |
| **Irby et al., 2016** | Narrative review  - | - | - | Regular aerobic exercise routine is recommended as a means of managing and preventing migraine. Anyway, the optimal parameters of exercise regimens for migraine are still unclear. | - | 4 | Physical activity may not play an important role in triggering or exacerbating migraine. |
| **Lippi et al., 2018** | Narrative review  - | - | - | High-intensity exercise should be avoided in patients with a history of exercise-provoked migraine  Regular moderate aerobic physical exercise (>40 min, 3 times per week) seems effective to reduce both the severity and frequency of migraine attacks. | - | 4 | Since exercising may sometimes worsen migraine, being engaged in physical exercise during a migraine attack must be established on an individual basis, according to the personal history of exercise-provoked migraine. |
| **Mauskop et al., 2012** | Narrative review  - | - | - | Aerobic exercise is proven to be effective  in the prevention of migraine  headaches. | - | 4 | No adverse effects were reported. |
| **Patel et al., 2019** | Narrative review  - | - | - | The overall data are  still insufficient to recommend aerobic exercise as a single  therapy for migraine prevention because of methodological limitations. | - | 4 | No adverse effects were reported. |
| **Robblee et al., 2019** | Narrative review  - |  | - | The best current recommendation for patients with migraine is to engage in graded moderate cardiorespiratory exercise, although any exercise is better than none. | - | 4 | No adverse effects were reported. |
| **Song et al., 2021** | Narrative review  - | - | - | Regarding efficacy, side effects, and health benefits, aerobic exercise promises to be a good strategy in the preventive treatment of migraine. | - | 4 | Exercise can trigger a migraine attack. Pain aggravation by routine physical activity has been reported by approximately 2/3 of individuals with migraine. High-intensity exercise and an insufficient warm-up period can trigger a migraine attack. |
| **Tepper et al., 2015** | Narrative review  - | - | - | Aerobic exercise combined with behavioural therapy may be useful as a complementary migraine management. | - | 4 | No adverse effects were reported. |
| **Wells et al., 2019** | Narrative review | Aerobic exercise | - | Aerobic exercise reduces migraine frequency, pain intensity, duration of migraine, and migraine disability. Also, yoga and tai-chi may be beneficial for migraine patients. | - | 4 | Physical exertion can trigger migraines in some patients. |
| **MODERATE-INTENSITY CONTINUOUS AEROBIC EXERCISE**  **GRADE OF RECOMMENDATION: B in favour of intervention** | | | | | | | |
| **Ahmadi et al., 2015** | RCT  ICHD-II  Episodic migraine | **Experimental group:** Aerobic exercise (n=15).  **Control group:** Were told not to exercise (n=14). | Frequency (attacks/month)  Pain intensity (VAS)  Duration (average minutes/attack).  Post-immediate | Significant improvement in all outcomes in the experimental group. No significant change in any variable in the control group. | No significant difference between groups in any outcome. | 1- | No adverse effects were reported. |
| **Belitardo-Oliveira et al., 2017** | RCT  ICHD II  Episodic migraine | **Experimental Group:** Aerobic exercise (n=10).  **Control Group:** Waiting list (n=10). | Frequency (days with migraine /month). | Significant improvement in the experimental group. No significant change in the control group. | Analysis not performed. | 1- | No adverse effects were reported. |
| **Belitardo-Oliveira et al., 2019** | RCT  Migraine ICHD-II  Episodic migraine | **Migraine aerobic** exercise group (n=13).  **Migraine waitlist** group (n=12).  **Control aerobic** exercise group (n=12).  **Control waiting list** group (n=13). | Frequency (attacks/month and days with migraine /month)  Pain intensity (0 = no pain; 1 = mild; 2 = moderate; 3 = severe).  Post-immediate. | Migraine exercise: Significant improvement in attacks/month, days/month. No significant change in pain intensity.  Migraine waitlist: No significant change in any outcome. | Favours significantly migraine exercise over migraine waitlist in days with migraine.  No significant change in pain intensity. | 1- | No adverse effects were reported. |
| **Hanssen et al., 2017** | RCT  ICHD III-B  Episodic migraine | **Experimental group**: HIIT group (n=16).  **Experimental group**: MCT group (n=16).  **Control Group:** Maintain habitual daily physical activity profile and received additional standard physical activity recommendations (n=16). | Frequency (days/month).  Post-immediate. | No significant improvement in any group. | Significant difference that favours HIIT versus MCT.  No significant difference between HIIT-Control and MCT-Control. | 1- | No adverse effects were reported. |
| **Hanssen et al., 2018** | RCT  Episodic migraine without aura ICHD-IIIb | **Experimental group 1**: HIIT group (n=15).  **Experimental group 2:** MCT group (n=15).  **Control Group**: maintain habitual physical activity profile (n=15). | Frequency (days/month).  Post-immediate. | No significant improvement in any group. | Significant difference that favours HIIT versus MCT.  No significant difference between HIIT-Control and MCT-Control. | 1- | No adverse effects were reported. |
| **Varkey et al., 2011** | RCT  ICHD-II  Episodic migraine | **Group 1**: Relaxation group. (n=30).  **Group 2:** Aerobic exercise group. (n=30).  **Group 3:** Topiramate group.  (n=31). | Frequency (attacks/month and days with migraine / month)  Pain intensity (VAS)  Quality of life (MSQoL).  Post during treatment period.  Post during last month of treatment.  Post 3 months.  Post 6 months. | Post during the treatment period:  Significant reduction in attacks/month in all groups.  No significant changes in other outcomes in any group. | Post during the treatment period:  Significant difference between groups in pain intensity favours the topiramate group.  No significant difference between groups in attacks/month, days with migraine/month. | 1- | No adverse effects were reported. |
|  |  |  |  | Post during the last month of treatment:  Significant reduction in attacks/month in all groups.  No significant change in other outcomes in any group. | Post during the last month of treatment:  No significant difference between groups in any outcome. |  |  |
|  |  |  |  | Post 3 months:  Significant reduction in attacks/month in all groups.  No significant change in other outcomes in any group. | Post 3 months:  No significant difference between groups in any outcome. |  |  |
|  |  |  |  | Post 6 months:  Significant reduction in attacks/month in all groups.  No significant change in other outcomes in any group. | Post 6 months:  No significant difference between groups in any outcome. |  |  |
| **Darabaneanu et al., 2011** | Q-RCT  IHS  Episodic migraine with or without aura | **Experimental group:** Aerobic exercise (n=8).  **Control group:** No exercise (n=8). | Frequency (days with migraine /month)  Pain intensity (NPRS)  Duration (h/month).  Post-immediate  Follow-up 8 weeks. | Significant improvement in all outcomes in the experimental group in post-immediate. No significant change in any outcome in the control group in post-immediate. | Significant interaction between exercise group and frequency and an interaction effect between exercise group and intensity of migraine attacks.  No significant difference in duration. | 1- | 1 person was excluded because of pain during exercise and 4 persons because of a lack of motivation to perform the training. |
| **Luedtke et al., 2020** | Q-RCT  ICHD-III  Chronic or frequent episodic migraine | **Group 1:** Standard physiotherapy (manual therapy mobilization, myofascial treatment, exercise and education) (n=79).  **Group 2:** Aerobic exercise (n=24). | Frequency (days/month)  Disability (MIDAS). | Post-immediate:  No significant change in any outcome measure. | Post-immediate:  No significant differences in any outcome measure. | 1- | 2 patients discontinued the aerobic group because they reported an increase in headache intensity. |
|  |  |  |  | Post 4 weeks:  No significant change in any outcome measure | Post 4 weeks:  No significant differences in any outcome measure |  |  |
|  |  |  |  | Post 3 months:  No significant change in any outcome measure | Post 3 months:  No significant differences in any outcome measure |  |  |
| **Narin et al., 2003** | Q-RCT  Episodic migraine without aura. IHS | **Experimental group:** Moderate aerobic training and medical treatment. (n=20).    **Control group:** Medical treatment (n=20). | Pain frequency (attack/month)  Pain intensity (VAS)  Duration (hours)  Disability (PDI).  Post-immediate. | Significant improvements in both groups in frequency and disability. | Significant differences in pain relief favour the experimental group. | 1- | No adverse effects were reported. |
| **Overath et al., 2014** | Q-RCT  IHS  Episodic migraine with or without aura | Exercise cohort (n=28). | Frequency (attacks/month)  Frequency (days/month).  Post-immediate. | Significant improvements in all outcomes in favour of intervention. | - | 1- | No adverse effects were reported. |
| **Varkey et al., 2009** | Q-RCT  ICHD-II  Episodic migraine with or without aura | Aerobic exercise (n=26). | Frequency of days (days/month)  Frequency of attacks (attacks/month)  Intensity (VAS)  Quality of life (MSQol).    Post-immediate. | Significant improvements in all outcomes in favour of intervention. | - | 1- | One patient reported a migraine attack immediately after training.  3 dropouts because of noncompliance with the treatment, and 3 dropouts because of lack of time. |
| **Hagan et al., 2020** | Cohort  Episodic migraine. ICHD-III | Exercise cohort (n=98). | Headache frequency (headache/month)  Intensity (VAS)  Duration (hours).  Post-immediate. | Moderate-vigorous exercise at least three times per week had fewer headache frequency, though not statistically significant. This association was significantly stronger in those who used prophylactic medication for migraines. | - | 2+ | No adverse effects were reported. |
| **YOGA**  **GRADE OF RECOMMENDATION: B in favour of intervention** | | | | | | | |
| **Long et al., 2022** | SR of MA of RCT  ICHD-IIIb | **Experimental group:** Yoga.  **Control group:**  Standard treatment. | Frequency (Attacks/month)  Pain intensity (10-point scale)  Duration (hours)  Disability (MIDAS and HIT-6). | - | Compared with the control group, yoga therapy could decrease pain intensity, frequency, duration and disability. | 1- | No adverse effects were reported. |
| **Wu et al., 2022** | SR and MA of RCT  ICHD III | **Experimental group**: Yoga therapy.  **Control group:** Standard medical treatment and self-care. | Frequency (headaches days/month, headaches/week)  Intensity (VAS or NRS)  Duration (hours)  Disability (HIT-6 and MIDAS). | - | Compared with the control group, yoga therapy was associated with substantially reduced headache frequency and HIT-6 score, but revealed no obvious influence on pain intensity. | 1- | No adverse effects were reported. |
| **Boroujeni et al., 2015** | RCT  Episodic migraine IHS | **Experimental Group:** Yoga and pharmacological intervention (n=18).  **Control group:** Pharmacological intervention (n=14). | Frequency (Headaches/month)  Intensity (VAS)  Duration (days)  Disability (HIT-6).  Post-immediate. | Experimental group:  Significant improvements in frequency, intensity and disability, but not in duration.  Control group:  No significant improvements. | Significant improvements in intensity, frequency and disability favour the experimental group. No significant differences in duration. | 1- | No adverse effects were reported related to yoga. |
| **John et al., 2007** | RCT  Episodic migraine without aura. IHS 2004 | **Experimental group**: yoga (n=36).  **Control group:** self-care (n=36). | Frequency (headache days/week)  Intensity (NRS and VAS)  Duration (hours).  Post-immediate. | Experimental group:  Significant improvements in frequency, intensity, and duration of attack.  Control group: Significant increase of symptoms in all outcomes except duration. | Significant improvements in frequency, intensity and duration of pain favours the experimental group. | 1- | No adverse effects were reported. |
| **Kisan et al., 2014** | RCT  Episodic migraine ICHD-II | **Experimental group**: Yoga and conventional care (n=30).  **Control group:** Conventional care (n=30). | Frequency (Number of headaches/month)  Intensity (VAS)  Disability (HIT-6).  Post-immediate. | Significant improvements in all outcomes in both groups. | Significant improvements in all outcomes favour the experimental group in post-immediate follow-up. | 1- | No adverse effects were reported. |
| **Kumar et al., 2020** | RCT  Episodic migraine ICHD-III-beta | **Experimental group**: Yoga and medical therapy (n=80).  **Control group:** Medical therapy (n=80). | Frequency (headaches days/month)  Intensity (VAS)  Disability (HIT-6 and MIDAS).  Post-immediate (3 months). | Significant improvement in all outcomes in both groups. | Significant improvements in all outcomes favour experimental group in post-immediate follow-up. | 1- | 1 patient reported weight gain in the intervention group, due to medication. |
| **Mehta et al., 2020** | RCT  ICHD III  Episodic migraine, with or without aura | **Group 1:** Physical therapy: PMR exercise, stretching, isometric exercise of neck muscles, and cardiorespiratory endurance training. (n=20).    **Group 2:** Yoga. (n=20).    **Group 3:** Standard treatment. (n=21). | Frequency (headaches/month)  Intensity (VAS)  Disability (HIT-6).    1 month since the initiation of the intervention  2 months since the initiation of the intervention  3 months since the initiation of the intervention (post-immediate). | Frequency:  Significant reduction in all groups at 1 month, 2 month and 3 months  Intensity:  Significant reduction in all groups at 1 month, 2 month and 3 months  Disability:  Significant reduction in all groups at 2 and 3 months. | Frequency reduced significantly in group 1, compared to yoga and standard treatment. No significant differences in other outcomes were observed. | 1- | No adverse effects were reported. |
| **Wells et al., 2020** | RCT  ICHD-II  Episodic migraine | **Experimental group:** Standardized training in mindfulness/yoga (n=45).  **Control group:** Headache education group (n=44). | Frequency (migraine days/month)  Intensity (VAS)  Duration (no data)  Disability (MIDAS and HIT-6)  Quality of life (MSQv 2.1).  4 weeks post-treatment.  16 weeks post-treatment.  28 weeks post-treatment. | At 4 weeks post-treatment, both groups showed a reduction in frequency.  At 4, 16 and 28 weeks post-treatment a reduction in disability and an increase in quality of life was observed in the experimental group compared with the baseline.  No significant changes over time in intensity and duration. | Significant differences favour the experimental group in disability and quality of life at 4, 16 and 28 weeks post-treatment. | 1- | No adverse effects were reported due to the intervention. |
| **Barber et al., 2020** | Narrative review | **-** | - | The addition of exercise to a traditional preventive regimen may provide added benefits. Patients who cannot tolerate high-impact exercise may even benefit from low-impact exercise like yoga. | - | 4 | Exercise may induce migraine. |
| **Wells et al., 2019** | Narrative review | **-** | - | Aerobic exercise reduces migraine frequency, pain intensity, duration of migraine, and migraine disability. Also, yoga and tai-chi may be beneficial for migraine patients. | - | 4 | Physical exertion can trigger migraines in some patients. |
| **EXERCISE AND LIFESTYLE RECOMMENDATIONS**  **GRADE OF RECOMMENDATION: B in favour of intervention** | | | | | | | |
| **Lemstra et al., 2002** | RCT  Chronic migraine with or without aura diagnosed with IHS criteria | **Experimental group**: exercise therapy, relaxation, stress management, massage therapy and dietary lecture. (n=44).  **Control group:** waiting list with standard care with patient´s family physician (n=36). | Frequency (days/month)  Pain intensity (VAS)  Duration (hours/month)  Quality of life (PDI).  Post-immediate.  3 months follow up. | The intervention group experienced statistically significant changes in frequency, pain intensity, duration, disability and quality of life at 3 months follow-up, but not in the control group. | Significant differences in frequency, intensity, duration and quality of life favour the experimental group. | 1- | Eight subjects in the intervention group reported minor musculoskeletal pain. |
| **Bond et al., 2018** | RCT  ICHD-III  Episodic and chronic migraine with or without aura | **Experimental group**: fat-restricted diet, 250 minutes/week of home-based exercise and behavioural modification strategies. (n=54).  **Control group:** Migraine education. (n=56). | Frequency (days/month)  Pain intensity (NPRS)  Duration (hours/attack)  Disability (HIT-6).  Post-immediate.  4 months follow-up. | Significant reduction in all outcomes in the control group, significant reduction in attack duration and disability but no significant change in frequency and pain intensity in the experimental group in post-immediate.  Significant reduction in all outcomes in the experimental and control groups except for pain intensity in the control group at follow-up. | No significant difference between groups in any outcome at any endpoint assessment. | 1- | No adverse effects were reported. |
| **Seok et al., 2006** | Cohort    ICHD II  Chronic migraine | Lifestyle recommendations with exercise cohort (n=136). | Frequency (headaches/month).  1-year follow-up. | Regular exercise was significant positive contributor to the reversion of transformed migraine into episodic migraine. | - | 2+ | No adverse effects were reported. |
| **Woldeamanuel et al., 2016** | Cohort  ICHD-IIb  Chronic and episodic migraine | **Group 1**: Episodic migraine. (n=175).  **Group 2:** Chronic migraine (n=175). | Regular lifestyle behaviours of sleep, exercise, mealtime patterns and hydration status. | The chronic migraine cohort showed less regular lifestyle behaviours, including exercise habit, than the episodic migraine cohort. | - | 2+ | No adverse effects were reported. |
| **Gaul et al., 2011** | Cohort  ICHD-II  Episodic and chronic migraine with or without aura | Muscular progressive relaxation, headache education, aerobic exercise, individual psychology therapy, group behavioural treatment with lifestyle recommendations cohort (n=210). | Frequency (attacks/month and days with migraine/month). | There was a reduction of 45% in the number of attacks per month, and a mean reduction of 4 days with migraine per month.  Significant amount difference in adherence to lifestyle modification recommendations between the patients who showed a reduction of ≥ 50% in headache days per month and the ones who did not fulfil this outcome at the primary endpoint. | - | 2- | No adverse effects were reported. |
| **Agbetou et al., 2022** | Narrative review  Chronic and episodic migraine | - | - | Lifestyle modifications are essential in reducing the frequency and severity of migraine attacks. Managing obesity, alcohol, and tobacco consumption discontinuation, regular physical activity, sufficient hydration, and a healthy lifestyle are highly accessible and cost-efficient interventions for any patient with migraine. | - | 4 |  |
| **RELAXATION TECHNIQUES**  **GRADE OF RECOMMENDATION: C in favour of intervention** | | | | | | | |
| **Meyer et al., 2016** | RCT  Episodic migraine with and without aura. IHS criteria | **Group 1:** PMR training in migraine patients (n=16).  **Group 2:** waiting list for migraine patients (n=19).  **Group 3:** PMR training in healthy subjects (n=21).  **Group 4**: Waiting list for healthy subjects (n=25). | Frequency (days/month and attacks/month).  Post-immediate and follow-up of 3 months. | Significant improvements in frequency in favour of PMR training in migraine group in post-immediate and follow-up. | Post-immediate and follow–up: Significant differences in frequency favour the PMR training in migraine group versus the waiting list for migraine patients’ group. | 1- | No adverse effects were reported. |
| **Minen et al., 2020** | RCT  Episodic and chronic migraine  ICHD-IIIb | **Experimental group**: PMR with a smartphone. (n=77).  **Control group**: only download the smartphone app. (n=62). | Frequency (Days/month)  Disability (MIDAS).  Post-immediate.  Follow-up 3 months. | There were no significant differences in all outcomes post-immediate and in follow-up. | There was a greater no significant decline in disability in favour of the experimental group at post-immediate and follow-up. | 1- | No adverse effects were reported. |
| **Varkey et al., 2011** | RCT  ICHD-II  Episodic migraine | **Group 1**: Relaxation group. (n=30).  **Group 2:** Aerobic exercise group. (n=30).  **Group 3:** Topiramate group.  (n=31). | Frequency (attacks/month and days with migraine / month)  Pain intensity (VAS)  Quality of life (MSQoL).  Post during treatment period.  Post during last month of treatment.  Post 3 months.  Post 6 months. | Post during the treatment period:  Significant reduction in attacks/month in all groups.  No significant changes in other outcomes in any group. | Post during the treatment period:  Significant difference between groups in pain intensity favours the topiramate group.  No significant difference between groups in attacks/month, days with migraine/month. | 1- | No adverse effects were reported. |
| Post during the last month of treatment:  Significant reduction in attacks/month in all groups.  No significant change in other outcomes in any group. | Post during the last month of treatment:  No significant difference between groups in any outcome. |
| Post 3 months:  Significant reduction in attacks/month in all groups.  No significant change in other outcomes in any group. | Post 3 months:  No significant difference between groups in any outcome. |
| Post 6 months:  Significant reduction in attacks/month in all groups.  No significant change in other outcomes in any group. | Post 6 months:  No significant difference between groups in any outcome. |
| **Meyer et al., 2018** | Narrative review  - | - | - | PMR is useful in prophylactic migraine therapy and provides indications of a cortical mechanism of action. | - | 4 | No adverse effects were reported. |
| **HIGH-INTENSITY AEROBIC INTERVAL TRAINING**  **GRADE OF RECOMMENDATION: C in favour of intervention** | | | | | | | |
| **Hanssen et al., 2017** | RCT  ICHD III-B  Episodic migraine | **Experimental group**: HIIT group (n=16).  **Experimental group**: MCT group (n=16).  **Control Group:** Maintain habitual daily physical activity profile and received additional standard physical activity recommendations (n=16). | Frequency (days/month).  Post-immediate. | No significant improvement in any group. | Significant difference that favours HIIT versus MCT.  No significant difference between HIIT-Control and MCT-Control. | 1- | No adverse effects were reported. |
| **Hanssen et al., 2018** | RCT  Episodic migraine without aura ICHD-IIIb | **Experimental group 1**: HIIT group (n=15).  **Experimental group 2:** MCT group (n=15).  **Control Group**: maintain habitual physical activity profile (n=15). | Frequency (days/month).  Post-immediate. | No significant improvement in all groups. | Significant difference that favours HIIT versus MCT.  No significant difference between HIIT-Control and MCT-Control. | 1- | No adverse effects were reported. |
| **Matin et al., 2022** | RCT  ICHD II  Episodic migraine | **Group 1:** HIIT (n=15).  **Group 2:** Supplementation (Magnesium + B12) (n=15).  **Group 3:** HIIT + Supplementation  (n=15).  **Group 4:** Control group: Migraine cases  (n=15). | Frequency (days/month)  Intensity (10/15 disabling, 5/9 moderate, ¼ mild)  Duration of attacks (minutes)  Disability (MIDAS).  Post-immediate. | Significant improvement in all outcomes in all groups. | Significant improvement in all outcomes in favour of HIIT vs control. | 1- | No adverse effects were reported. |
| **LOW-INTENSITY AEROBIC EXERCISE**  **GRADE OF RECOMMENDATION: C in favour of intervention** | | | | | | | |
| **Santiago et al., 2014** | RCT  ICHD-II  Chronic migraine | **Experimental group:** Amitriptyline and aerobic exercise. (n=30).  **Control group**: Amitriptyline alone. (n=30). | Frequency (days/month)  Intensity: 1 (mild), 2 (moderate) and 3 (disabling)  Duration of headache (hours/day).  Post-immediate. | - | Significant improvements-favour the experimental group in frequency, moderate pain intensity and duration. | 1- | 6 persons withdrew for non-adherence to the proposed physical treatment. |
| **Koseoglu et al., 2003** | q-RCT  IHS  Episodic migraine without aura | Aerobic exercise (n=40) | Frequency (attacks/month)  Intensity (a four-degree scale)  Duration (hours of attack/month).  Post-immediate. | Significant improvements in all outcomes. | - | 1- | No adverse effects were reported. |
| **EXERCISE AND RELAXATION TECHNIQUES**  **GRADE OF RECOMMENDATION: C in favour of intervention** | | | | | | | |
| **Dittrich et al., 2008** | RCT  Episodic migraine with and without aura.  ICHD-I | **Experimental group:** Aerobic exercise group and relaxation (n=15).    **Control group:** information about  Physical activity (n=15). | Frequency (attacks/month)  Pain intensity (slight, moderate, intense, very intense, intolerable)  Quality of life (PLC). | There were no significant differences in any outcome except in pain intensity in favour of the exercise group at post-immediate. | There were no significant differences in any outcome at post-immediate. | 1- | No adverse effects were reported. |
| **Mehta et al., 2020** | RCT  ICHD III  Episodic migraine, with or without aura | **Group 1:** Physical therapy: PMR exercise, stretching, isometric exercise of neck muscles, and cardiorespiratory endurance training. (n=20).    **Group 2:** Yoga. (n=20).    **Group 3:** Standard treatment. (n=21). | Frequency (headaches/month)  Intensity (VAS)  Disability (HIT-6).    1 month since the initiation of the intervention.  2 months since the initiation of the intervention.  3 months since the initiation of the intervention (post-immediate). | Frequency:  Significant reduction in all groups at 1 month, 2 month and 3 months.  Intensity:  Significant reduction in all groups at 1 month, 2 month and 3 months.  Disability:  Significant reduction in all groups at 2 and 3 months. | Frequency reduced significantly in group 1, compared to yoga and standard treatment. No significant differences in other outcomes were observed. | 1- | No adverse effects were reported. |
| **Butt et al., 2022** | Q-RCT  Episodic and chronic migraine | **Experimental group**: supervised exercises protocol, including aerobic exercise and PMR (n=14).  **Control group:** prophylactic medicines (n=14). | Pain Intensity (NPRS)  Disability (MIDAS, HIT-6, HDI).  Post-immediate. | There were significant differences in all outcomes in both groups at post-immediate. | There were significant differences in all outcomes between groups at post-immediate that favour the experimental group. | 1- | No adverse effects were reported. |
| **Becker et al., 2009** | Narrative review  - | Multidisciplinary treatment, not only medication management is needed in migraine patients. Exercise and relaxation techniques are important components of stress and symptomatic management. For migraine, a more substantial relaxation training program might be necessary. | - | - | - | 4 | No adverse effects were reported. |
| **NECK STRENGTH EXERCISE**  **GRADE OF RECOMMENDATION: C against the intervention** | | | | | | | |
| **Benatto et al., 2022** | RCT  Episodic migraine  ICHD-III | **Experimental group:**  craniocervical muscle-strengthening exercise (n=21).  **Control group:** sham ultrasound group (n=21). | Frequency (days with headache/month)  Intensity (NRS)  Disability (MIDAS).  Post-immediate  1-month post-intervention.  2-month post-intervention.  3-month post-intervention. | Only significant difference in the intensity of headache for both groups. | No significant differences in any outcome. | 1- | No adverse effects were reported. |
| **RESISTANCE EXERCISE**  **GRADE OF RECOMMENDATION: C in favour of intervention** | | | | | | | |
| **Aslani et al., 2022** | RCT  Episodic migraine  ICHD | **Experimental group**: Resistance training. (n=10).  **Control group**: No exercise. (n=10). | Frequency (attacks/month)  Intensity (VAS)  Duration (Days)  Quality of life (HIT-6).  Post-immediate. | All outcomes improved significantly in the exercise group in the pre-post measures. | There were significant differences that favour resistance training in all outcomes. | 1- | No adverse effects were reported. |
|  |  |  |  |  |  |  |  |
| **QI-GONG**  **GRADE OF RECOMMENDATION: D in favour of intervention** | | | | | | | |
| **Elinoff et al., 2019** | Case series  ICHD-II.  Episodic migraine | Kiko Exercise and its background.  (n=13). | Frequency (attack/month)  Intensity (1 to 5 scale)  Disability (MIDAS).  Post-immediate. | Disability score reduced by 50% in 4/6 patients.  Intensity did not show improvement  Frequency was improved in more than 1 attack in 3/6 patients. | - | 3 | No adverse effects were reported. |
| **TAI-CHI**  **GRADE OF RECOMMENDATION: D in favour of intervention** | | | | | | | |
| **Wells et al., 2019** | Narrative review | - | - | Aerobic exercise reduces migraine frequency, pain intensity, duration of migraine, and migraine disability. Also, yoga and tai-chi may be beneficial for migraine patients. | - | 4 | Physical exertion can trigger migraines in some patients. |

**Abbreviations:** HDI**,** Headache Disability Index;HIIT,High-Intensity Interval Training;ICHD,International Classification of Headache Disorders;HIT, Headache Impact Test; HIT-6, Headache Impact Test-6; IHS,International Headache Society; MA,Meta-Analysis;MCT, Moderate Continuous Training;MIDAS, Migraine Disability Assessment questionnaire; MMA,Meta-Meta-Analysis;MSQoL,Migraine Specific Quality of life Questionnaire; MSQv 2.1, Migraine-Specific Quality of Life Questionnaire version 2.1; MVK pain scale, Modified Von Korff pain scale**;** NPRS,Numeric Pain Rating Scale; NRS, Numeric Rating Scale; PDI,Pain Disability Index;PLC, Quality of Life Profile for the Chronically Ill; PMR,Progressive Muscle Relaxation;q-RCT,quasi-Randomized Clinical Trial;RCT,Randomized Controlled Trial;SF-12, Short Form-12 Health Survey; SF-36, Short Form-36 Health Survey; SR,Systematic Review;VAS, Visual Analogue Scale; WHO-5, Five Well-Being Index.
