# Supplementary material for: Prescription of Therapeutic Exercise in Migraine. An Evidence-Based Clinical Practice Guideline of the Professional College of Physiotherapists of the Community of Madrid
Source: Research Square preprint supplement (doi:10.21203/rs.3.rs-2625246/v1), 2023-03-02
Supplement: Supplementary file 9 [file eec062aff86575139416e324.docx]

**Table 3.** PEDro scale for randomized controlled trials.

| **Studies** | **Item nº2** | **Item nº3** | **Item nº4** | **Item nº5** | **Item nº6** | **Item nº7** | **Item nº8** | **Item nº9** | **Item nº10** | **Item nº11** | **Total** |
| --- | --- | --- | --- | --- | --- | --- | --- | --- | --- | --- | --- |
| **Ahmadi et al., 2015** | Yes | No | Yes | No | No | No | No | No | Yes | Yes | **4** |
| **Aslani et al., 2022** | Yes | No | Yes | No | No | No | No | No | Yes | Yes | **4** |
| **Benatto et al., 2022** | Yes | Yes | No | No | No | Yes | Yes | No | Yes | Yes | **6** |
| **Bond et al., 2018** | Yes | Yes | Yes | No | No | No | No | Yes | Yes | Yes | **6** |
| **Boroujeni et al., 2015** | Yes | No | No | No | No | No | No | No | Yes | Yes | **3** |
| **Butt et al., 2020** | No | No | Yes | No | No | No | Yes | Yes | Yes | Yes | **5** |
| **Darabaneanu et al., 2011** | No | No | Yes | No | No | No | No | No | Yes | Yes | **3** |
| **Dittrich et al., 2008** | Yes | No | Yes | No | No | No | Yes | Yes | Yes | Yes | **6** |
| **Hanssen et al., 2017** | Yes | No | No | No | No | No | No | No | Yes | Yes | **3** |
| **Hanssen et al., 2018** | Yes | No | No | No | No | No | No | No | Yes | Yes | **3** |
| **John et al., 2007** | Yes | No | Yes | No | No | No | Yes | No | Yes | Yes | **5** |
| **Kisan et al., 2014** | Yes | Yes | No | No | No | No | No | No | Yes | Yes | **4** |
| **Koseoglu et al., 2003** | No | No | No | No | No | No | Yes | No | No | Yes | **2** |
| **Kumar et al., 2020** | Yes | Yes | No | No | No | No | No | Yes | Yes | Yes | **5** |
| **Lemstra et al., 2002** | Yes | Yes | Yes | No | No | No | Yes | Yes | Yes | Yes | **7** |
| **Luedtke et al., 2020** | No | No | No | No | No | No | Yes | No | Yes | Yes | **3** |
| **Matin et al., 2022** | Yes | No | No | No | No | No | Yes | No | Yes | Yes | **4** |
| **Mehta et al., 2020** | Yes | Yes | Yes | No | No | No | Yes | Yes | Yes | Yes | **7** |
| **Meyer et al., 2016** | No | No | Yes | No | No | No | No | No | Yes | Yes | **3** |
| **Minen et al., 2020** | Yes | No | Yes | No | No | No | No | No | Yes | Yes | **4** |
| **Narin et al., 2003** | No | No | Yes | No | No | No | Yes | Yes | Yes | Yes | **5** |
| **Oliveira et al., 2017** | Yes | No | Yes | No | No | No | Yes | No | Yes | Yes | **5** |
| **Oliveira et al., 2019** | Yes | No | Yes | No | No | No | Yes | Yes | Yes | Yes | **6** |
| **Overath et al., 2014** | No | No | No | Yes | No | No | Yes | No | No | Yes | **3** |
| **Santiago et al., 2014** | Yes | No | Yes | No | No | No | No | No | Yes | Yes | **4** |
| **Varkey et al., 2009** | No | No | No | No | No | No | Yes | No | No | Yes | **2** |
| **Varkey et al., 2011** | Yes | Yes | Yes | No | No | No | No | Yes | Yes | Yes | **6** |
| **Wells et al., 2021** | Yes | Yes | Yes | Yes | No | Yes | No | Yes | Yes | Yes | **8** |
