# Supplementary material for: Prescription of Therapeutic Exercise in Migraine. An Evidence-Based Clinical Practice Guideline of the Professional College of Physiotherapists of the Community of Madrid
Source: Research Square preprint supplement (doi:10.21203/rs.3.rs-2625246/v1), 2023-03-02
Supplement: Supplementary file 10 [file fa6e2beb9456d118256bd2f6.docx]

**Table 10.** Prescription parameters used in each of the studies.

| **Tipe of intervention** | **Trial** | **Design** | **Group** | **Distribution** | **Frequency** | **Duration** | **Intensity** | **Exercise testing** |
| --- | --- | --- | --- | --- | --- | --- | --- | --- |
| **Moderate intensity continuous aerobic exercise** | **Ahmadi et al. 2015** | RCT | Exercise Group | Supervised/Unsupervised: No info.  Warm-up = 15 min  Main training = 20 min  Cool down = 5 min.  Training material = No info. | 3 times/week for 8 weeks. | Total duration = 40 min. | Warm up = Gradual increase in intensity between 11-13 Borg.  Main training = Gradual increase in intensity between 14-16 Borg.  Cool down = Borg 11-13. | - |
|  | **Belitardo-Oliveira 2017** | RCT | Exercise group | Supervised exercise.  Warm-up = 5 min walking on a treadmill.  Main training = 30 min walking on a treadmill.  Cool-down = 5 min walking on a treadmill. | 3 times/week for 12 weeks. | Total duration = 40 min. | Main training = intensity corresponding to the participant’s ventilatory threshold. | -VO2 max.  -Ventilatory threshold. |
|  | **Belitardo-Oliveira 2019** | RCT | Exercise group | Supervised exercise.  Warm-up = 5 min walking/jogging on a treadmill.  Main training = 30 min walking/jogging on a treadmill.  Cool-down = 5 min walking/jogging on a treadmill. | 3 times /week for 12 weeks. | Total duration = 40 min. | Main training = speed (m/min), HR, and self-perceived effort corresponding to the participant’s ventilatory threshold. | - VO2 max.  -Ventilatory threshold. |
|  | **Hanssen et al 2017** | RCT | MCT | Supervised exercise.  Warm-up = 400 m easy running on a treadmill and 2 skipping exercises.  Main training = Continuous running on a treadmill.  Cool down = 400 m easy running on a treadmill and stretching exercises. | 2 times/week for 12 weeks. | Main training = 45 min. | Main training = 70% HRmax (±5 bpm). | -Individual  anaerobic  lactate-threshold  -HRmax  - VO2 max  (supervised). |
|  | **Hanssen et al 2018** | RCT | MCT | Supervised exercise.  Warm-up = 400 m easy running on a treadmill and 2 skipping exercises.  Main training = Continuous running on a treadmill.  Cool down = 400 m easy running on a treadmill and stretching exercises. | 2 times/week for 12 weeks. | Main training = 45 min. | Main training = 70% HRmax (±5 bpm). | -Individual  anaerobic  lactate-threshold  -HRmax  - VO2 max  (supervised). |
|  | **Varkey et al. 2011** | RCT | Exercise group | Supervised exercise.  Exercise (15 min warm-up,  20 min exercise and 5 min cool-down). | 3 times/week for 12 weeks. | Total duration = 40 min. | Exercise group intensity based on a Borg’s scale of Rated Perceived Exertion (6-20).  -Warm up: 11-13.  -Exercise: 14-16.  -Cool-down: 11-13. |  |
|  | **Darabaneanu et al. 2011** | q-RCT | Exercise group | Supervised exercise.  Warm-up = 10 min on a treadmill.  Main training = Jogging on a treadmill.  Cool down = 10 min on a treadmill. | 3 times/week for 10 weeks. | Main training jogging duration of 14th-30th session: 30 min continuously.  Main training jogging-walking intervals duration from 1st to 13th session (min): 1-2, 2-2, 2-1, 3-1, 3-1, 4-1, 4-1, 5-1, 7-1, 7-1, 10-1, 10-1, 10-1. | - | - |
|  | **Luedtke et al., 2020** | q-RCT | Supervised Aerobic Exercise Group | Warm-up = 5-10 min.  Main training = 30 min aerobic exercise.  Cool-down = 5-10 min.  Supervised aerobic exercise modalities = cycling ergometer, treadmill, or cross-trainer.  Unsupervised aerobic exercise modalities = nordic walking, slow running, outdoor cycling, swimming, cycling ergometer, other activities. | 2 times/week for 5 weeks.  1st session/week supervised.  2nd session/week unsupervised. | Total duration = 40-50 min. | Main training for non-trained patients:11-13 Borg.  Main training for trained patients:14-15 Borg. | - |
|  | **Narin et al. 2003** | q-RCT | Exercise group | Supervised exercise  5 min warm-up, 10 min  cycling, 10 min walking on a treadmill, 5 min stepper, 10 min training upper extremities at the power station, 10 repetitions of neck and postural exercises, 10 repetitions of rowing and 5 min of cool-down. | 3 times/week for 8 weeks. | Total duration = 60 min. |  |  |
|  | **Overath et al. 2014** | q-RCT | Exercise group (no control group) | Supervised exercise.  Warm up = 5-10 min walking.  Main training = 30 min walking or jogging.  Cool-down = 5-10 min walking and stretching. | 3 times/week for 10 weeks. | Main training jogging duration of 6th-10th session: 30 min continuously.  Main training jogging-walking intervals duration from 1st to 5th session (min): Steady increase in running time compared to walking time through weeks. | - | - |
|  | **Varkey et al. 2009** | q-RCT | Exercise group (no control group | Supervised exercise.  Warm up = 15 min indoor cycling.  Main training = 20 min indoor cycling.  Cool-down = 5 min indoor cycling. | 3 times/week for 12 weeks. | Total duration = 40 min. | Warm up = 11-13 Borg.  Main training = 14-16 Borg.  Cool-down = 11-13 Borg. | - |
|  | **Hagan et al. 2020** | Cohort | Exercise | Unsupervised exercise. | 0, 1-2, 3-4 or 5 times/week. | - | Light: normal walking, walking downstairs, yoga, gardening, etc.  Moderate: brisk walking, lawn mowing, shoveling, dancing, etc.  Vigorous: jogging, running, cycling fast, kickboxing, etc. | - |
| **Yoga** | **Boroujeni et al. 2015** | RCT | Yoga | Supervised exercise  -Eye-related exercises  -Backward bending exercises  -Fist pavanmoktasana  -Second pavanmoktasana  -Third pavanmoktasana  -Pre-pranayama yoga  -Standing-sitting and lying out screw position  -Neti exercises  -Shavasanas or relaxation  Training modality: No info. | 3 times/week for 12 weeks. | Total duration = 75 min. | - | - |
|  | **John et al. 2007** | RCT | Yoga | Supervised exercise  -Yoga postures = Stretching of neck, shoulder, back muscles followed by relaxation, toning, strengthening, and flexibility.  -Breathing and Pranayama.  -Kriya = Jalaneti (nasal water cleansing) followed by Kapalbhanti (forced exhalations). | 5 times/week for 12 weeks. | Total duration = 60 min. | - | - |
|  | **Kisan et al. 2014** | RCT | Yoga + conventional care | Supervised exercise  -Relaxation exercises.  -Breathing exercises.  -Asanas/posture with awareness.  -Shavasana.  Training modality: No info. | 5 times/week for 6 weeks. | Total duration =  60 min. | - | - |
|  | **Kumar et al. 2020** | RCT | Yoga + medical treatment | Supervised exercise  -Prayer = 1 min.  -Breathing exercises = 8 min.  -Instant relaxation technique = 1 min.  -Sukshma vyayama = 15 min.  -Surya namaskar = 3 min.  -Quick relaxation technique = 3 min.  -Asanas = 8 min.  -Savana-yoga = 10 min.  -Pranayama = 15 min.  Training modality: No info. | 3 times/ week for 4 weeks. | Total duration = 60 min. | - | - |
|  | **Mehta 2020** | RCT | Yoga +  Standard Drug Therapy | Supervised exercise  Pranayama, Asana and  Savasana.  Training material: No info. | Daily for 3 months. | Total duration = 40 min. | - | - |
|  | **Wells 2020** | RCT | Mindfulness-based stress reduction (standardized training in mindfulness/yoga) | Electronic audio files for home mindfulness/yoga practice. | 2 hours/week for 8 weeks with optional retreat day. | Total duration = 30 min . | - | - |
| **Exercise and lifestyle recommendations** | **Bond et al 2018** | RCT | Behavioral weight loss | Unsupervised.  Home-based exercise. | 5 days/week for 16 weeks. | Total duration = Gradually progressed to 50 min of home-based exercise/session. | - | - |
|  | **Lemstra et al. 2002** | RCT | Exercise group | Supervised exercise  18 group sessions of  aerobic training,  strength training, massage, stress management and dietary lecture.  (relaxation and behavioural therapy)  Training modality: No info. | 6 weeks with 3 months follow-up. | - | - | - |
|  | **Gaul et al. 2011** | Cohort | Muscular progressive relaxation, aerobic exercise and lifestyle recommendation. | Supervised exercise  -Headache education = 60 min.  -Behavioural group session = 90 min.  -Relaxation training = 60 min.  -Physical therapy = 60 min.  -Aerobic ergometer training = 60 min. | Sessions applied 5 days/week minimum. | Total duration of programme = 5 h and 30 min. | - | - |
|  | **Seok et al. 2006** | Cohort | Lifestyle behaviour modifications, exercise and medication use | Unsupervised exercise.  Maintaining regular exercise.  Training modality: No info. | Session applied at least 3 times/week minimum. | Total duration = 30 min minimum per session. | - | - |
|  | **Woldeamanuel et al. 2016** | Cohort | Regular Lifestyle Behaviours cohort | Unsupervised exercise.  Maintain daily aerobic exercise of any form. | Session applied at least 6 months  Minimum. | Total duration = 20 min minimum. | Exercise that raises heart rate. | - |
| **High-Intensity aerobic Interval Training** | **Hanssen et al. 2017** | RCT | HIIT | Supervised exercise.  Warm-up = 400 m easy running on a treadmill and 2 skipping exercises.  Main training = High-intensity interval running on a treadmill.  Cool down = 400 m easy running on a treadmill and stretching exercises. | 2 times/week for 12 weeks. | High-intensity intervals vs active rest period (min) = 4-3.  High-intensity intervals were repeated 4 times, with a total duration of 16 min of high-intensity. | High-intensity intervals = 90-95% HRmax (±5 bpm) reached after 1 min from the beginning of the high-intensity interval.  Active rest intervals = 70% HRmax. | -Individual  anaerobic  lactate-threshold  -HRmax  -VO2 max  (supervised). |
|  | **Hanssen et al 2018** | RCT | HIIT | Supervised exercise.  Warm-up = 400 m easy running on a treadmill and 2 skipping exercises.  Main training = High-intensity interval running on a treadmill.  Cool down = 400 m easy running on a treadmill and stretching exercises. | 2 times/week for 12 weeks. | High-intensity intervals vs active rest period (min) = 4-3.  High-intensity intervals were repeated 4 times, with a total duration of 16 min of high-intensity. | High-intensity intervals = 90-95% HRmax (±5 bpm) reached after 1 min from the beginning of the high-intensity interval.  Active rest intervals = 70% HRmax. | -Individual  anaerobic  lactate-threshold  -HRmax  -VO2 max  (supervised). |
|  | **Matin et al. 2022** | RCT | High-Intensity Interval Aerobic Exercise, B12 and Magnesium Supplementation Group. | Supervised exercise.  Warm-up = 10 min  Main training.  Cool down = 10 min.  Training modality: Possibly outdoor and indoor cycling. | 3 times/week for 8 weeks. | Main training from 1st to 8th wk (min): 10, 15, 20, 25, 30, 35, 40, 40.  High-intensity interval duration: No info.  Low-intensity interval duration: No info. | High-intensity interval Borg’s rating from 1st to 8th wk: 11, 12, 14, 15, 16, 17, 18, 18.  High-intensity interval % VO2 max from 1st to 8th wk: 60, 60, 60-65, 65-70, 70-75, 70-75, 75-80, 80.  Low-intensity intervals: No info. | -VO2 max. |
| **Low-intensity aerobic exercise** | **Santiago et al. 2014** | RCT | Amitriptyline and Aerobic Exercise Group | Unsupervised exercise.  Warm-up exercises.  Main training = Fast walking outdoors. | 3 times/week for 12 weeks. | Total duration = 40 min. | - | - |
|  | **Koseoglu et al. 2003** | q-RCT | Exercise group (no control group) | Unsupervised exercise.  Warm up = 10 min.  Main training = 20 min aerobic exercise.  Resting period = 10 min.  Training material = No info. | 3 times/week for 6 weeks. | Total duration = 40 min. | Main training = 60% HRmax. | HRmax. |
| **Relaxation techniques** | **Meyer 2016** | RCT | Progressive Muscle  Relaxation | Supervised exercise  16 muscle groups that were slightly tensed and thereafter relaxed.  Training modality: No info. | 1 time per week for 6 weeks. | - | - | - |
|  | **Minen 2020** | RCT | Progressive  Muscle  Relaxation | Unsupervised exercise  Smartphone app with Progressive Muscle  Relaxation program =15 min.  Training modality: No info. | 2-4 times per week, for 6 weeks with a follow-up of 3 months. | Total duration = 15 min. | - | - |
|  | **Varkey et al. 2011** | RCT | Relaxation group | Unsupervised relaxation.  Relaxation (6 relaxation exercises, each exercise 5-20 min). | Daily. | Total duration: 30-120 min. | - | - |
| **Exercise and relaxation techniques** | **Butt et al. 2022** | RCT | Moderate Intensity Continuous Aerobic Exercise and Progressive Muscle Relaxation Group | Supervised exercise.  Warm-up = 10 min stationary cycling.  Aerobic exercise main training = 30 min stationary cycling.  Cool down = 5 min stationary cycling.  Progressive muscle relaxation = 15 min. | 3 times/week for 6 weeks. | Total duration = 60 min. | - | - |
|  | **Dittrich et al. 2008** | RCT | Exercise group | No information of supervision  -Warm-up = 5 min.  -Aerobic exercise  including training of  coordination = 15-25 min.  -Strength training = 10-20 min.  -Stretching = 5 min.  -Progressive muscle  relaxation = 15 min. | 2 times/week for 6 weeks. | Total duration = 60 min. | - | - |
|  | **Mehta 2020** | RCT | Physiotherapy and Standard Drug Therapy  (Relaxation and exercise) | Supervised exercise  Progressive muscle relaxation exercise, self-stretching of neck muscles (30 seconds hold 3 repetitions), isometric exercise of neck muscles (5 seconds hold; 10 repetitions) and cardiorespiratory endurance training (30 minutes walking).  Training material: No info. | Daily for 3 months. | Total duration = 40 min. | - | - |
| **Resistance exercise** | **Aslani 2022** | RCT | Resistance  Training | Supervised exercise  Warm up = 5 min jogging, 5 min stretching and 5 min weightlifting.  Main training = 2-3 sets of 8-15 repetitions of arm pull down, arm pull over, sit up, leg extension, leg curl.  Cool down = 5 min active cooling and stretching movements.  Training modality: No info. | 3 times/week for 8 weeks. | Total duration = 30-45 min. | Main training performed from 45% RM to 75% RM gradually progressed through the 8 weeks. | RM. |
| **Neck strength exercise** | **Bennato 2022** | RCT | Neck strength exercise | First 6 weeks: 2 sets of 10 repetitions with 10 seconds of endurance for the deep cervical flexor and extensor muscles. Progression in series, repetitions and endurance was based on absence of complaint or pain, and/or execution of movement without compensation in each volunteer.  Last 2 weeks: add to the previous exercise 3 sets of 15 repetitions for flexor and extensor superficial cervical muscle. | 2 sessions/day for 8 weeks.  Supervised by a physiotherapist once a week for 20 minutes in an individual session. The rest of the program was done at home. | - | - | - |
| **Qi-gong** | **Elinoff et al. 2019** | Case series | Qigong Exercise | Supervised exercise  -First face-to-face exercise sequence = Ju Fu (Gentle Wind).  -Qigong exercise DVD duplicating the content of the first and subsequent lessons for home practice = 10 min minimally.  -Two subsequent face-to-face sessions to reinforce training and add complexity and length to the Kiko sequence. | -Daily home practice  -Two subsequent face-to-face sessions every 30 days. | Total duration = 10 min at least. | - | - |

**Abbreviations:** bpm, beats per minute; HIIT, High-Intensity Interval Training; HR, Heart Rate; HRmax, maximal heart rate; MCT, Moderate Continuous Training; m/min, metres/minute; min, minute; q-RCT, Quasi-Randomized Controlled Trial; RCT, Randomized Controlled Trial; RM, Repetition Maximum; VO2max, maximal oxygen uptake.
