# Supplementary material for: Prescription of Therapeutic Exercise in Migraine. An Evidence-Based Clinical Practice Guideline of the Professional College of Physiotherapists of the Community of Madrid
Source: Research Square preprint supplement (doi:10.21203/rs.3.rs-2625246/v1), 2023-03-02
Supplement: Supplementary file 11 [file fb17c8a85fcc4217ee9cee5a.docx]

**Table 5.** Item Quality Assessment Tool for Case Series Studies Scale.

| **Studies** | **Item nº1** | **Item nº2** | **Item nº3** | **Item nº4** | **Item nº5** | **Item nº6** | **Item nº7** | **Item nº8** | **Item nº9** | **Total** |
| --- | --- | --- | --- | --- | --- | --- | --- | --- | --- | --- |
| **Elinoff et al., 2019** | 1 | 1 | 1 | 1 | 1 | 1 | 1 | 0 | 1 | 8 (Excellent) |
